# Supplementary material for: Clinical outcomes of remdesivir-treated COVID-19 patients in South Korea
Source: PubMed Central journal article supplement — Osong Public Health Res Perspect. 2022 Oct 18;13(5):370–6. doi: 10.24171/j.phrp.2022.0138 (PMC9633264; doi:10.24171/j.phrp.2022.0138), 2022-10-18
Supplement: j-phrp-2022-0138-suppl1.pdf [file j-phrp-2022-0138-suppl1.pdf]

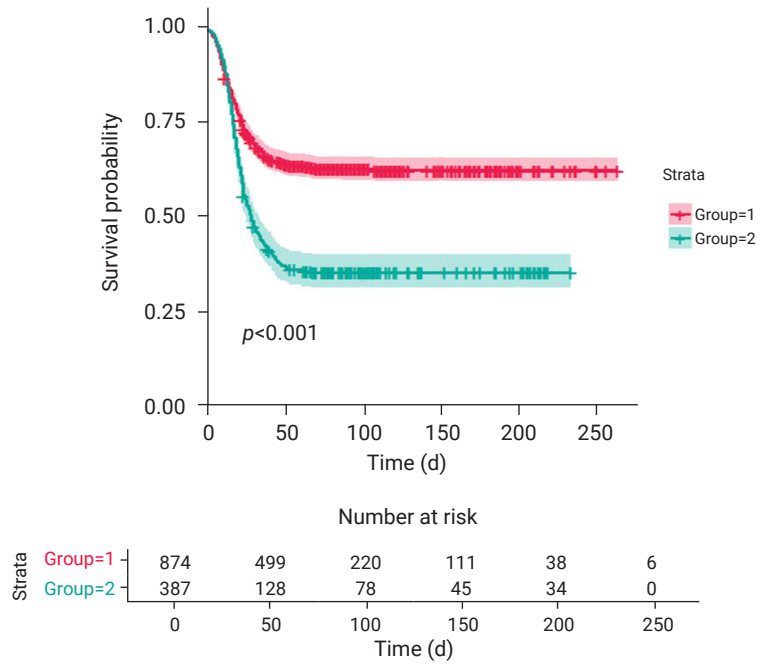

**Figure S1.** Survival curves of severe cases aged  $\geq 70$  years with or without remdesivir treatment. The treatment group had a higher survival rate ( $p < 0.001$ ). Group1 is a treated group and Group 2 is a untreated group.
